# Supplementary material
Source: PubMed Central journal article supplement (PMC7993525)
Supplement: 13578_2021_567_MOESM1_ESM.pdf [file 13578_2021_567_MOESM1_ESM.pdf]

**Supplemental Table S1. Conservation scores for SARS-CoV-2 human protein-protein host interactome in *Drosophila*.**

| <b>Viral Protein</b> | <b>Human Protein</b> | <b>DIOPT Score</b> | <b>Fly Ortholog</b> | <b>Fly Flybase ID</b> |
|----------------------|----------------------|--------------------|---------------------|-----------------------|
| Nsp1                 | POLA1                | 15                 | DNApol-alpha180     | FBgn0259113           |
| Nsp1                 | PRIM1                | 14                 | DNApol-alpha50      | FBgn0011762           |
| Nsp1                 | PRIM2                | 14                 | DNApol-alpha60      | FBgn0259676           |
| Nsp1                 | POLA2                | 15                 | DNApol-alpha73      | FBgn0005696           |
| Nsp1                 | COLGALT1             | 12                 | CG31915             | FBgn0051915           |
| Nsp1                 | PKP2                 | 4                  | p120ctn             | FBgn0260799           |
| Nsp2                 | SLC27A2              | 6                  | Fatp2               | FBgn0265187           |
| Nsp2                 | EIF4E2               | 13                 | eIF4EHP             | FBgn0053100           |
| Nsp2                 | POR                  | 14                 | Cpr                 | FBgn0015623           |
| Nsp2                 | RAP1GDS1             | 15                 | vimar               | FBgn0022960           |
| Nsp2                 | WASHC4               | 14                 | SWIP                | FBgn0030739           |
| Nsp2                 | FKBP15               | 4                  | CG3342              | FBgn0029874           |
| Nsp2                 | GIGYF2               | 10                 | Gyf                 | FBgn0039936           |
| Nsp4                 | IDE                  | 14                 | Ide                 | FBgn0001247           |
| Nsp4                 | TIMM10               | 14                 | Tim10               | FBgn0027360           |
| Nsp4                 | ALG11                | 13                 | Alg11               | FBgn0037108           |
| Nsp4                 | NUP210               | 15                 | Gp210               | FBgn0266580           |
| Nsp4                 | TIMM29               | 13                 | CG14270             | FBgn0029665           |
| Nsp4                 | DNAJC11              | 14                 | CG8531              | FBgn0033918           |
| Nsp4                 | TIMM10B              | 11                 | Tim9b               | FBgn0027358           |
| Nsp4                 | TIMM9                | 15                 | Tim9a               | FBgn0030480           |
| Nsp5                 | HDAC2                | 13                 | HDAC1               | FBgn0015805           |
| Nsp5_C145A           | GPX1                 | 3                  | CG15116             | FBgn0034415           |
| Nsp5_C145A           | TRMT1                | 15                 | CG6388              | FBgn0032430           |
| Nsp6                 | ATP5MG               | 15                 | ATPsynG             | FBgn0010612           |
| Nsp6                 | ATP6AP1              | 9                  | VhaAC45             | FBgn0262515           |
| Nsp6                 | SIGMAR1              | 1                  | CG43446             | FBgn0263400           |
| Nsp6                 | ATP13A3              | 13                 | anne                | FBgn0052000           |
| Nsp7                 | AGPS                 | 14                 | ADPS                | FBgn0033983           |
| Nsp7                 | CYB5B                | 13                 | Cyt-b5              | FBgn0264294           |
| Nsp7                 | ACSL3                | 14                 | Acsl                | FBgn0263120           |
| Nsp7                 | CYB5R3               | 11                 | CG5946              | FBgn0036211           |
| Nsp7                 | RALA                 | 13                 | Rala                | FBgn0015286           |
| Nsp7                 | COMT                 | 0                  |                     |                       |
| Nsp7                 | RAB5C                | 13                 | Rab5                | FBgn0014010           |
| Nsp7                 | RAB7A                | 13                 | Rab7                | FBgn0015795           |
| Nsp7                 | RAB8A                | 13                 | Rab8                | FBgn0262518           |
| Nsp7                 | RAB2A                | 13                 | Rab2                | FBgn0014009           |
| Nsp7                 | RAB10                | 12                 | Rab10               | FBgn0015789           |
| Nsp7                 | RAB14                | 13                 | Rab14               | FBgn0015791           |
| Nsp7                 | RHOA                 | 13                 | Rho1                | FBgn0014020           |
| Nsp7                 | RAB1A                | 13                 | Rab1                | FBgn0285937           |
| Nsp7                 | GNB1                 | 15                 | Gbeta13F            | FBgn0001105           |
| Nsp7                 | GNG5                 | 8                  | Ggamma1             | FBgn0004921           |

|      |           |    |                 |                          |
|------|-----------|----|-----------------|--------------------------|
| Nsp7 | LMAN2     | 13 | CG5510          | FBgn0039160              |
| Nsp7 | MOGS      | 15 | GCS1            | FBgn0030289              |
| Nsp7 | TOR1AIP1  | 1  | TORIP           | FBgn0036908              |
| Nsp7 | MTARC1    | 13 | Marc            | FBgn0033451              |
| Nsp7 | QSOX2     | 15 | Qsox2           | FBgn0038919              |
| Nsp7 | HS2ST1    | 14 | Hs2st           | FBgn0024230              |
| Nsp7 | NDUFAF2   | 6  | CG43346         | FBgn0263051              |
| Nsp7 | SCCPDH    | 15 | Sccpdh1::Sccpdh | FBgn0037298::FBgn0038038 |
| Nsp7 | SCARB1    | 8  | crq::emp        | FBgn0010435::FBgn0015924 |
| Nsp7 | NAT14     | 1  | CG18542         | FBgn0037731              |
| Nsp7 | DKAKD     | 15 | Dpck            | FBgn0037469              |
| Nsp7 | FAM162A   | 11 | CG9231          | FBgn0036887              |
| Nsp7 | DNAJC19   | 13 | CG7394          | FBgn0036173              |
| Nsp7 | SELENOS   | 0  |                 |                          |
| Nsp7 | PTGES2    | 14 | Su(P)           | FBgn0004465              |
| Nsp7 | RAB18     | 13 | Rab18           | FBgn0015794              |
| Nsp8 | MPHOSPH10 | 12 | CG13097         | FBgn0032051              |
| Nsp8 | SRP72     | 14 | Srp72           | FBgn0038810              |
| Nsp8 | ATE1      | 14 | Ate1            | FBgn0025720              |
| Nsp8 | NSD2      | 12 | NSD             | FBgn0039559              |
| Nsp8 | SRP19     | 14 | Srp19           | FBgn0015298              |
| Nsp8 | SRP54     | 11 | Srp54k          | FBgn0010747              |
| Nsp8 | MRPS25    | 13 | mRpS25          | FBgn0030572              |
| Nsp8 | DDX10     | 14 | CG5800          | FBgn0030855              |
| Nsp8 | LARP7     | 10 | Larp7           | FBgn0260771              |
| Nsp8 | MEPCE     | 11 | CG1239          | FBgn0037368              |
| Nsp8 | NGDN      | 14 | CG11030         | FBgn0031736              |
| Nsp8 | EXOSC8    | 2  | Rrp42::Rrp45    | FBgn0030789::FBgn0034065 |
| Nsp8 | NARS2     | 15 | AsnRS-m         | FBgn0034177              |
| Nsp8 | NOL10     | 14 | l(2)34Fd        | FBgn0261535              |
| Nsp8 | CCDC86    | 8  | CG14210         | FBgn0031040              |
| Nsp8 | SEPSECS   | 13 | CG1427          | FBgn0037347              |
| Nsp8 | EXOSC5    | 15 | Rrp46           | FBgn0037815              |
| Nsp8 | EXOSC3    | 15 | Rrp40           | FBgn0260648              |
| Nsp8 | AATF      | 12 | Aatf            | FBgn0031851              |
| Nsp8 | HECTD1    | 15 | Ufd4            | FBgn0032208              |
| Nsp8 | MRPS2     | 14 | mRpS2           | FBgn0031639              |
| Nsp8 | MRPS5     | 14 | mRpS5           | FBgn0044510              |
| Nsp8 | EXOSC2    | 15 | Rrp4            | FBgn0034879              |
| Nsp8 | MRPS27    | 9  | CG4882          | FBgn0025336              |
| Nsp9 | GTF2F2    | 15 | TflIFbeta       | FBgn0010421              |
| Nsp9 | FBN1      | 3  | dpy::frac       | FBgn0035798::FBgn0053196 |
| Nsp9 | FBN2      | 4  | dpy             | FBgn0053196              |
| Nsp9 | NUP214    | 10 | Nup214          | FBgn0010660              |
| Nsp9 | NUP62     | 10 | Nup62           | FBgn0034118              |
| Nsp9 | DCAF7     | 13 | wap             | FBgn0266848              |
| Nsp9 | EIF4H     | 13 | eIF4H1          | FBgn0262734              |
| Nsp9 | NUP54     | 12 | Nup54           | FBgn0033737              |

|       |         |    |                                     |                                                                         |
|-------|---------|----|-------------------------------------|-------------------------------------------------------------------------|
| Nsp9  | MIB1    | 15 | mib1                                | FBgn0263601                                                             |
| Nsp9  | SPART   | 13 | spartin                             | FBgn0037265                                                             |
| Nsp9  | NEK9    | 9  | niki                                | FBgn0045980                                                             |
| Nsp9  | ZNF503  | 13 | noc                                 | FBgn0005771                                                             |
| Nsp9  | NUP88   | 14 | mbo                                 | FBgn0026207                                                             |
| Nsp9  | NUP58   | 12 | Nup58                               | FBgn0038722                                                             |
| Nsp9  | MAT2B   | 3  | CG5854                              | FBgn0039130                                                             |
| Nsp9  | FBLN5   | 3  | frac                                | FBgn0035798                                                             |
| Nsp10 | AP2A2   | 13 | AP-2alpha                           | FBgn0264855                                                             |
| Nsp10 | GFER    | 12 | Alr                                 | FBgn0031068                                                             |
| Nsp10 | ERGIC1  | 2  | CG4293::CG7011                      | FBgn0024983::FBgn0036489                                                |
| Nsp10 | AP2M1   | 13 | AP-2mu                              | FBgn0263351                                                             |
| Nsp10 | GRPEL1  | 14 | Roe1                                | FBgn0014877                                                             |
| Nsp11 | TBCA    | 15 | CG1890                              | FBgn0039869                                                             |
| Nsp12 | SBNO1   | 13 | sno                                 | FBgn0265630                                                             |
| Nsp12 | BCKDK   | 2  | Pdk                                 | FBgn0017558                                                             |
| Nsp12 | AKAP8   | 0  |                                     |                                                                         |
| Nsp12 | MYCBP2  | 14 | hiw                                 | FBgn0030600                                                             |
| Nsp12 | SLU7    | 14 | Slu7                                | FBgn0039626                                                             |
| Nsp12 | RIPK1   | 2  | slpr::Tak1                          | FBgn0026323::FBgn0030018                                                |
| Nsp12 | UBAP2L  | 10 | lig                                 | FBgn0020279                                                             |
| Nsp12 | TYSND1  | 13 | CG3589                              | FBgn0035065                                                             |
| Nsp12 | PDZD11  | 2  | veli                                | FBgn0039269                                                             |
| Nsp12 | PRRC2B  | 4  | nocte                               | FBgn0261710                                                             |
| Nsp12 | UBAP2   | 11 | lig                                 | FBgn0020279                                                             |
| Nsp12 | ZNF318  | 8  | CG9776                              | FBgn0027866                                                             |
| Nsp12 | CRTC3   | 7  | Crtc                                | FBgn0036746                                                             |
| Nsp12 | USP54   | 6  | ec                                  | FBgn0000542                                                             |
| Nsp12 | ZC3H7A  | 0  |                                     |                                                                         |
| Nsp12 | LARP4B  | 7  | Larp4B                              | FBgn0035424                                                             |
| Nsp12 | RBM41   | 2  | CG44249::Snp                        | FBgn0265184::FBgn0265192                                                |
| Nsp12 | TCF12   | 12 | da                                  | FBgn0267821                                                             |
| Nsp12 | PPIL3   | 14 | CG11777                             | FBgn0033527                                                             |
| Nsp12 | PLEKHA5 | 5  | CG34383                             | FBgn0085412                                                             |
| Nsp13 | TBKBP1  | 0  |                                     |                                                                         |
| Nsp13 | CIT     | 12 | sti                                 | FBgn0002466                                                             |
| Nsp13 | HSBP1   | 12 | CG5446                              | FBgn0032429                                                             |
| Nsp13 | PCNT    | 6  | Plp                                 | FBgn0086690                                                             |
| Nsp13 | CEP43   | 0  |                                     |                                                                         |
| Nsp13 | PRKAR2A | 13 | Pka-R2                              | FBgn0022382                                                             |
| Nsp13 | PRKACA  | 13 | Pka-C1                              | FBgn0000273                                                             |
| Nsp13 | PRKAR2B | 11 | Pka-R2                              | FBgn0022382                                                             |
| Nsp13 | RDX     | 13 | Moe                                 | FBgn0011661                                                             |
| Nsp13 | CENPF   | 1  | cana::cmet::Golgin<br>245::lva::mud | FBgn0002873::FBgn0029688<br>::FBgn0034854::FBgn004023<br>2::FBgn0040233 |
| Nsp13 | TLE1    | 11 | gro                                 | FBgn0001139                                                             |
| Nsp13 | TLE3    | 12 | gro                                 | FBgn0001139                                                             |
| Nsp13 | TLE5    | 4  | gro                                 | FBgn0001139                                                             |

|       |          |    |                                                                       |                                                                                                                         |
|-------|----------|----|-----------------------------------------------------------------------|-------------------------------------------------------------------------------------------------------------------------|
| Nsp13 | GOLGA3   | 2  | GCC185                                                                | FBgn0037979                                                                                                             |
| Nsp13 | GOLGA2   | 9  | GM130                                                                 | FBgn0034697                                                                                                             |
| Nsp13 | GOLGB1   | 2  | Golgin245                                                             | FBgn0034854                                                                                                             |
| Nsp13 | GRIPAP1  | 0  |                                                                       |                                                                                                                         |
| Nsp13 | CEP350   | 1  | CG9279::CLIP-190::DCTN1-p150                                          | FBgn0001108::FBgn0020503<br>::FBgn0036882                                                                               |
| Nsp13 | PDE4DIP  | 2  | cnn                                                                   | FBgn0013765                                                                                                             |
| Nsp13 | CEP135   | 12 | Cep135                                                                | FBgn0036480                                                                                                             |
| Nsp13 | CEP68    | 0  |                                                                       |                                                                                                                         |
| Nsp13 | CNTRL    | 1  | Cep97::CG10839::CG13708::CG14185::CG8800::Ppr-Y::sds22::TbCMF46::tilB | FBgn0014395::FBgn0028858<br>::FBgn0028992::FBgn0031575::FBgn0032163::FBgn0033408::FBgn0035577::FBgn0036936::FBgn0046697 |
| Nsp13 | ERC1     | 6  | brp                                                                   | FBgn0259246                                                                                                             |
| Nsp13 | GCC2     | 10 | GCC185                                                                | FBgn0037979                                                                                                             |
| Nsp13 | CLIP4    | 2  | CG9279::CLIP-                                                         | FBgn0020503::FBgn0036882                                                                                                |
| Nsp13 | NIN      | 7  | Bsg25D                                                                | FBgn0000228                                                                                                             |
| Nsp13 | CEP112   | 0  |                                                                       |                                                                                                                         |
| Nsp13 | MIPOL1   | 0  |                                                                       |                                                                                                                         |
| Nsp13 | USP13    | 12 | Usp5                                                                  | FBgn0035402                                                                                                             |
| Nsp13 | GCC1     | 14 | GCC88                                                                 | FBgn0037881                                                                                                             |
| Nsp13 | JAKMIP1  | 2  | Pif1A                                                                 | FBgn0261015                                                                                                             |
| Nsp13 | CDK5RAP2 | 5  | cnn                                                                   | FBgn0013765                                                                                                             |
| Nsp13 | AKAP9    | 5  | Plp                                                                   | FBgn0086690                                                                                                             |
| Nsp13 | GORASP1  | 8  | Grasp65                                                               | FBgn0036919                                                                                                             |
| Nsp13 | FYCO1    | 2  | rush                                                                  | FBgn0025381                                                                                                             |
| Nsp13 | C1orf50  | 11 | CG31800                                                               | FBgn0051800                                                                                                             |
| Nsp13 | CEP250   | 7  | Root                                                                  | FBgn0039152                                                                                                             |
| Nsp13 | TBK1     | 13 | IKKepsilon                                                            | FBgn0086657                                                                                                             |
| Nsp13 | HOOK1    | 10 | hook                                                                  | FBgn0001202                                                                                                             |
| Nsp13 | NINL     | 8  | Bsg25D                                                                | FBgn0000228                                                                                                             |
| Nsp14 | GLA      | 12 | CG7997                                                                | FBgn0034117                                                                                                             |
| Nsp14 | IMPDH2   | 10 | ras                                                                   | FBgn0003204                                                                                                             |
| Nsp14 | SIRT5    | 1  | Sirt1::Sirt2::Sirt4::Sirt6::Sirt7                                     | FBgn0024291::FBgn0029783<br>::FBgn0037802::FBgn0038788::FBgn0039631                                                     |
| Nsp15 | NUTF2    | 15 | Ntf-2                                                                 | FBgn0031145                                                                                                             |
| Nsp15 | ARF6     | 15 | Arf51F                                                                | FBgn0013750                                                                                                             |
| Nsp15 | RNF41    | 15 | elgi                                                                  | FBgn0283649                                                                                                             |
| Spike | GOLGA7   | 12 | CG5447                                                                | FBgn0039427                                                                                                             |
| Spike | ZDHHHC5  | 10 | CG34449                                                               | FBgn0085478                                                                                                             |
| E     | AP3B1    | 13 | rb                                                                    | FBgn0003210                                                                                                             |
| E     | BRD4     | 9  | fs(1)h                                                                | FBgn0004656                                                                                                             |
| E     | BRD2     | 9  | fs(1)h                                                                | FBgn0004656                                                                                                             |
| E     | CWC27    | 13 | CG10907                                                               | FBgn0036207                                                                                                             |
| E     | ZC3H18   | 11 | CG1677                                                                | FBgn0029941                                                                                                             |
| E     | SLC44A2  | 13 | Ctl2                                                                  | FBgn0039637                                                                                                             |
| M     | PMPCB    | 15 | UQCR-C1                                                               | FBgn0038271                                                                                                             |

|       |          |    |                                  |                                                       |
|-------|----------|----|----------------------------------|-------------------------------------------------------|
| M     | YIF1A    | 12 | Yif1                             | FBgn0039450                                           |
| M     | ATP1B1   | 14 | nrv1::nrv3                       | FBgn0015776::FBgn0032946                              |
| M     | ACADM    | 14 | Mcad                             | FBgn0035811                                           |
| M     | ETFA     | 12 | wal                              | FBgn0010516                                           |
| M     | STOM     | 12 | CG42540                          | FBgn0260657                                           |
| M     | GGCX     | 14 | GC                               | FBgn0035245                                           |
| M     | ATP6V1A  | 13 | Vha68-1::Vha68-2                 | FBgn0263598::FBgn0265262                              |
| M     | PSMD8    | 15 | Rpn12                            | FBgn0028693                                           |
| M     | REEP5    | 14 | ReepB                            | FBgn0033906                                           |
| M     | PMPCA    | 15 | CG8728                           | FBgn0033235                                           |
| M     | ANO6     | 8  | CG6938                           | FBgn0036235                                           |
| M     | PITRM1   | 15 | CG3107                           | FBgn0033005                                           |
| M     | SLC30A9  | 15 | ZnT49B                           | FBgn0033762                                           |
| M     | FASTKD5  | 9  | CG2124                           | FBgn0030217                                           |
| M     | SLC30A7  | 15 | ZnT86D                           | FBgn0037875                                           |
| M     | TUBGCP3  | 15 | Grip91                           | FBgn0001612                                           |
| M     | COQ8B    | 15 | Coq8                             | FBgn0052649                                           |
| M     | SAAL1    | 7  | CG30467                          | FBgn0050467                                           |
| M     | REEP6    | 11 | ReepB                            | FBgn0033906                                           |
| M     | INTS4    | 14 | IntS4                            | FBgn0026679                                           |
| M     | SLC25A21 | 15 | CG5254                           | FBgn0040383                                           |
| M     | TUBGCP2  | 15 | Grip84                           | FBgn0026430                                           |
| M     | TARS2    | 6  | ThrRS                            | FBgn0027081                                           |
| M     | RTN4     | 9  | RtnI1                            | FBgn0053113                                           |
| M     | FAM8A1   | 12 | CG8237                           | FBgn0033350                                           |
| M     | AASS     | 15 | LKRSDH                           | FBgn0286198                                           |
| M     | AKAP8L   | 0  |                                  |                                                       |
| M     | AAR2     | 11 | CG12320                          | FBgn0038590                                           |
| M     | BZW2     | 12 | kra                              | FBgn0250753                                           |
| N     | RRP9     | 14 | U3-55K                           | FBgn0053505                                           |
| N     | PABPC1   | 12 | pAbp                             | FBgn0265297                                           |
| N     | CSNK2A2  | 7  | CklIalpha                        | FBgn0264492                                           |
| N     | CSNK2B   | 13 | CklIbeta                         | FBgn0000259                                           |
| N     | G3BP1    | 12 | rin                              | FBgn0015778                                           |
| N     | PABPC4   | 13 | pAbp                             | FBgn0265297                                           |
| N     | LARP1    | 10 | larp                             | FBgn0261618                                           |
| N     | FAM98A   | 12 | CG5913                           | FBgn0039385                                           |
| N     | SNIP1    | 12 | CG17168                          | FBgn0039943                                           |
| N     | UPF1     | 14 | Upf1                             | FBgn0030354                                           |
| N     | MOV10    | 8  | CG6967                           | FBgn0034187                                           |
| N     | G3BP2    | 10 | rin                              | FBgn0015778                                           |
| N     | DDX21    | 1  | CG10077::CG144<br>43::mahe::Rm62 | FBgn0003261::FBgn0029880<br>::FBgn0029979::FBgn003572 |
| N     | RBM28    | 12 | CG4806                           | FBgn0260456                                           |
| N     | RPL36    | 10 | RpL36                            | FBgn0002579                                           |
| Orf3a | HMOX1    | 10 | Ho                               | FBgn0037933                                           |
| Orf3a | TRIM59   | 3  | Oseg5                            | FBgn0032891                                           |
| Orf3a | ARL6IP6  | 5  | CG8321                           | FBgn0033677                                           |

|       |         |    |                                      |                                                                         |
|-------|---------|----|--------------------------------------|-------------------------------------------------------------------------|
| Orf3a | VPS39   | 14 | Vps39                                | FBgn0038593                                                             |
| Orf3a | CLCC1   | 0  |                                      |                                                                         |
| Orf3a | VPS11   | 13 | Vps11                                | FBgn0052350                                                             |
| Orf3a | SUN2    | 6  | koi                                  | FBgn0265003                                                             |
| Orf3a | ALG5    | 14 | wol                                  | FBgn0261020                                                             |
| Orf3b | STOML2  | 13 | Stoml2                               | FBgn0034936                                                             |
| Orf6  | NUP98   | 12 | Nup98-96                             | FBgn0039120                                                             |
| Orf6  | RAE1    | 13 | Rae1                                 | FBgn0034646                                                             |
| Orf6  | MTCH1   | 12 | Mtch                                 | FBgn0027786                                                             |
| Orf7a | HEATR3  | 14 | CG10286                              | FBgn0037439                                                             |
| Orf7a | MDN1    | 13 | CG13185                              | FBgn0033661                                                             |
| Orf8  | PLOD2   | 12 | Plod                                 | FBgn0036147                                                             |
| Orf8  | TOR1A   | 15 | Torsin                               | FBgn0025615                                                             |
| Orf8  | STC2    | 0  |                                      |                                                                         |
| Orf8  | PLAT    | 1  | CG6462::CG6592:<br>:CG7432::flz::Nrk | FBgn0020391::FBgn0035663<br>::FBgn0035669::FBgn003872<br>7::FBgn0286782 |
| Orf8  | ITGB1   | 14 | mys                                  | FBgn0004657                                                             |
| Orf8  | CISD3   | 12 | CG3420                               | FBgn0033100                                                             |
| Orf8  | COL6A1  | 1  | Mp                                   | FBgn0260660                                                             |
| Orf8  | PVR     | 2  | Fas3                                 | FBgn0000636                                                             |
| Orf8  | DNMT1   | 1  | Mt2                                  | FBgn0028707                                                             |
| Orf8  | LOX     | 3  | Loxl1::Loxl2                         | FBgn0034660::FBgn0039848                                                |
| Orf8  | PCSK6   | 7  | Fur2                                 | FBgn0004598                                                             |
| Orf8  | INHBE   | 8  | Actbeta                              | FBgn0024913                                                             |
| Orf8  | NPC2    | 13 | Npc2a                                | FBgn0031381                                                             |
| Orf8  | MFGE8   | 0  |                                      |                                                                         |
| Orf8  | OS9     | 3  | CG6766                               | FBgn0032398                                                             |
| Orf8  | NPTX1   | 2  | b6                                   | FBgn0024897                                                             |
| Orf8  | POGLUT2 | 3  | CG31139                              | FBgn0051139                                                             |
| Orf8  | POGLUT3 | 2  | CG31139                              | FBgn0051139                                                             |
| Orf8  | ERO1B   | 13 | Ero1L                                | FBgn0261274                                                             |
| Orf8  | PLD3    | 15 | CG9248                               | FBgn0032923                                                             |
| Orf8  | FOXRED2 | 1  | Fmo-1::Fmo-2                         | FBgn0033079::FBgn0034943                                                |
| Orf8  | CHPF    | 14 | CG43313                              | FBgn0263005                                                             |
| Orf8  | PUSL1   | 13 | CG34140                              | FBgn0083976                                                             |
| Orf8  | EMC1    | 13 | EMC1                                 | FBgn0037530                                                             |
| Orf8  | GGH     | 15 | I(3)72Dp                             | FBgn0263607                                                             |
| Orf8  | ERLEC1  | 14 | CG6766                               | FBgn0032398                                                             |
| Orf8  | IL17RA  | 0  |                                      |                                                                         |
| Orf8  | NGLY1   | 15 | Pngl                                 | FBgn0033050                                                             |
| Orf8  | HS6ST2  | 11 | Hs6st                                | FBgn0038755                                                             |
| Orf8  | SDF2    | 14 | CG11999                              | FBgn0037312                                                             |
| Orf8  | NEU1    | 0  |                                      |                                                                         |
| Orf8  | GDF15   | 3  | mav                                  | FBgn0039914                                                             |
| Orf8  | TM2D3   | 12 | amx                                  | FBgn0000077                                                             |
| Orf8  | ERP44   | 15 | CG9911                               | FBgn0030734                                                             |
| Orf8  | EDEM3   | 13 | Edem2                                | FBgn0032480                                                             |
| Orf8  | SIL1    | 13 | Sil1                                 | FBgn0039296                                                             |

|       |          |    |                                   |                                                       |
|-------|----------|----|-----------------------------------|-------------------------------------------------------|
| Orf8  | POFUT1   | 13 | O-fut1                            | FBgn0033901                                           |
| Orf8  | SMOC1    | 13 | magu                              | FBgn0262169                                           |
| Orf8  | PLEKHF2  | 15 | rush                              | FBgn0025381                                           |
| Orf8  | FBXL12   | 2  | CG12402::CG148<br>91::CG5003::CG9 | FBgn0032878::FBgn0038202<br>::FBgn0038445::FBgn003955 |
| Orf8  | UGGT2    | 13 | Uggt                              | FBgn0014075                                           |
| Orf8  | CHPF2    | 12 | CG43313                           | FBgn0263005                                           |
| Orf8  | ADAMTS1  | 7  | AdamTS-A                          | FBgn0286071                                           |
| Orf8  | HYOU1    | 15 | CG2918                            | FBgn0023529                                           |
| Orf8  | FKBP7    | 4  | Fkbp14                            | FBgn0010470                                           |
| Orf8  | ADAM9    | 7  | Meltrin                           | FBgn0265140                                           |
| Orf8  | FKBP10   | 2  | CG14715::Fkbp14<br>::Fkbp39       | FBgn0010470::FBgn0013269<br>::FBgn0037930             |
| Orf9b | SLC9A3R1 | 9  | CG10939                           | FBgn0010620                                           |
| Orf9b | CHMP2A   | 13 | Vps2                              | FBgn0039402                                           |
| Orf9b | CSDE1    | 15 | Unr                               | FBgn0263352                                           |
| Orf9b | TOMM70   | 15 | Tom70                             | FBgn0032397                                           |
| Orf9b | MARK3    | 12 | par-1                             | FBgn0260934                                           |
| Orf9b | MARK2    | 9  | par-1                             | FBgn0260934                                           |
| Orf9b | DPH5     | 13 | Dph5                              | FBgn0024558                                           |
| Orf9b | DCTPP1   | 0  |                                   |                                                       |
| Orf9b | MARK1    | 10 | par-1                             | FBgn0260934                                           |
| Orf9b | PTBP2    | 13 | heph                              | FBgn0011224                                           |
| Orf9b | BAG5     | 3  | stv                               | FBgn0086708                                           |
| Orf10 | PPT1     | 14 | Ppt1                              | FBgn0030057                                           |
| Orf10 | CUL2     | 14 | Cul2                              | FBgn0032956                                           |
| Orf10 | MAP7D1   | 4  | ens                               | FBgn0264693                                           |
| Orf10 | THTPA    | 0  |                                   |                                                       |
| Orf10 | ZYG11B   | 2  | CG12084                           | FBgn0043458                                           |
| Orf10 | TIMM8B   | 14 | Tim8                              | FBgn0027359                                           |
| Orf10 | RBX1     | 15 | Roc1a                             | FBgn0025638                                           |
| Orf10 | ELOC     | 15 | EloC                              | FBgn0266711                                           |
| Orf10 | ELOB     | 11 | EloB                              | FBgn0023212                                           |
